# Supplementary material for: The mitochondrial iron transporter ABCB7 is required for B cell development, proliferation, and class switch recombination in mice
Source: eLife journal article supplement (doi:10.7554/elife.69621), 2021-11-08
Supplement: fig5-data1 [file Figure 5-source data 1 Legend.docx]

**Figure 5 – source data 1**

This zip archive contains all raw gel images taken for semiquantitative PCR data shown in **Figure 5B**. Gels were photographed using an Omega Lum G gel imager, which saved the raw image files provided here. Individual files were named based on the VH gene family that was analyzed and images were saved as full resolution, 16-bit greyscale TIFF files. In addition to the unedited gel images, a labeled image is provided (named as “labeled”) for each gel.
